# Supplementary material
Source: Springer Nature journal article supplement (https://www.springermedizin.de/resource/supplementary/12936_2010_1677_MOESM1_ESM.pdf/9542336)

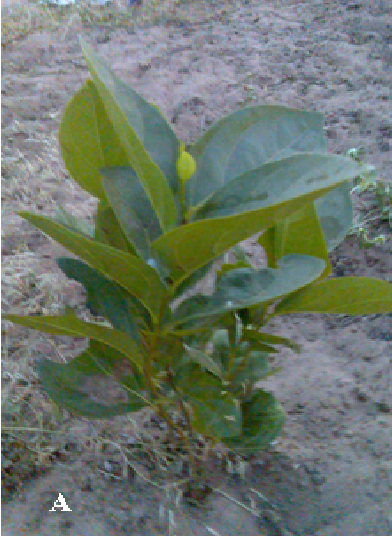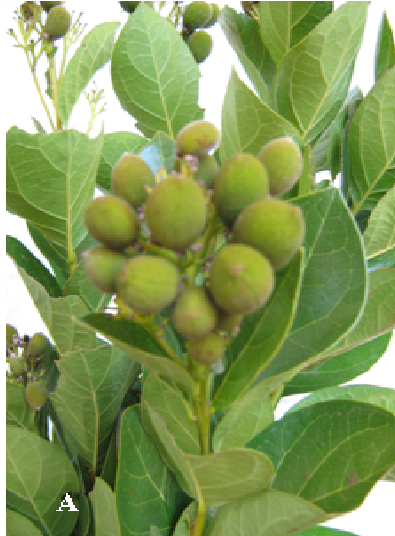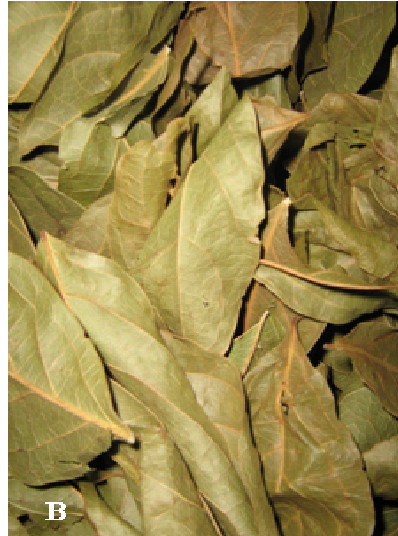

A

A

B

Supplement: MOESM1 [file 9542336]
